# Supplementary material
Source: Springer Nature journal article supplement (https://www.springermedizin.de/resource/supplementary/12885_2013_4456_MOESM16_ESM.pdf/9466468)

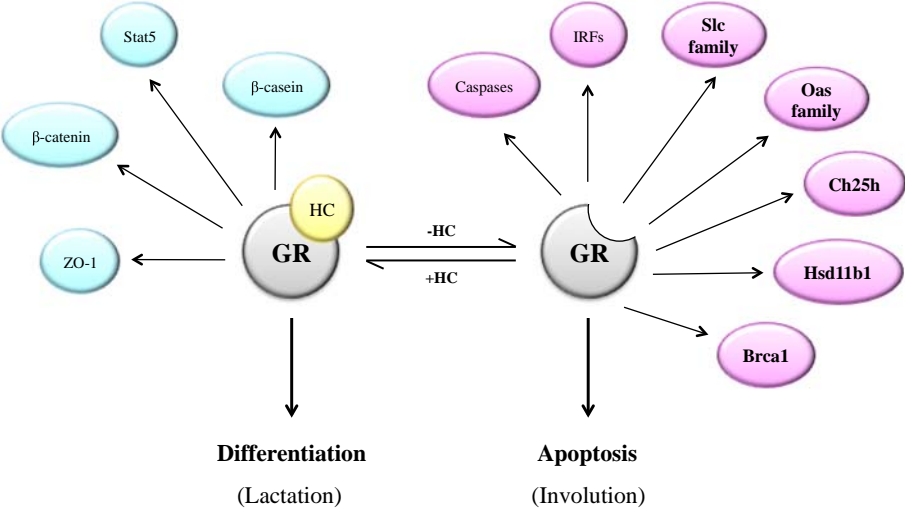

Supplement: MOESM16 [file 9466468]
